# Supplementary material for: Effects of HIV Infection in Plasma Free Fatty Acid Profiles among People with Non-Alcoholic Fatty Liver Disease
Source: MDPI journal article supplement (doi:10.3390/jcm11133842), 2022-07-02
Supplement: s1 [file s1]

# Effects of HIV infection in plasma free fatty acid profiles among people with non-alcoholic fatty liver disease

## Supplementary Materials

**Table S1. Antiretroviral regimens used by HIV-positive participants (n = 31)**

| <b>Drug regimen</b> | <b>N (%)</b> |
|---------------------|--------------|
| <b>INSTI-based</b>  |              |
| ABC + 3TC + DTG     | 12 (39)      |
| TDF + FTC + EVG/c   | 10 (32)      |
| TDF + 3TC + DTG     | 2 (6)        |
| 3TC + DTG           | 2 (6)        |
| TDF + FTC + DTG     | 1 (3)        |
| ABC + 3TC + RAL     | 1 (3)        |
| RPV + DTG           | 1 (3)        |
| <b>NNRTI-based</b>  |              |
| ABC + 3TC + NVP     | 1 (3)        |
| <b>PI-based</b>     |              |
| RPV + DRV/c         | 1 (3)        |

Abbreviations: 3TC, lamivudine; ABC, abacavir; DTG, dolutegravir; EVG/c, cobicistat-boosted elvitegravir; FTC, emtricitabine; INSTI, integrase strand transfer inhibitor; NNRTI, non-nucleoside reverse transcriptase inhibitor; NVP, nevirapine; PI, protease inhibitor; RAL, raltegravir; RPV, rilpivirine; TDF, tenofovir disoproxil fumarate

**Table S2. Adjusted differences in plasma individual fatty acids from NAFLD patients by HIV status**

|                                                       | Coefficient | 95% CI       | p-value      |
|-------------------------------------------------------|-------------|--------------|--------------|
| Lauric (C12:0)                                        | 0.00        | -0.65, 0.65  | 0.994        |
| <i>iso</i> -tetradecanoic (C14:0 <i>iso</i> )         | -1.58       | -3.78, 0.62  | 0.151        |
| Myristic (C14:0)                                      | 0.45        | -0.03, 0.94  | <b>0.065</b> |
| Pentadecanoic (C15:0)                                 | 1.72        | -0.21, 3.64  | 0.078        |
| <i>iso</i> -hexadecanoic (C16:0 <i>iso</i> )          | -0.92       | -2.86, 1.02  | 0.339        |
| Palmitic (C16:0)                                      | 0.17        | -0.08, 0.11  | 0.716        |
| <i>anteiso</i> -heptadecanoic (C17:0 <i>anteiso</i> ) | -0.23       | -1.88, 1.42  | 0.778        |
| Margaric (C17:0)                                      | -0.45       | -2.85, 1.95  | 0.703        |
| Stearic (C18:0)                                       | -0.10       | -0.32, 0.11  | 0.328        |
| Arachidic (C20:0)                                     | 0.04        | -0.83, 0.91  | 0.925        |
| Behenic (C22:0)                                       | 1.57        | 0.36, 2.79   | <b>0.013</b> |
| Lignoceric (C24:0)                                    | -0.67       | -1.11, -0.23 | <b>0.004</b> |
| Myristoleic (C14:1 <i>cis</i> 9)                      | -13.01      | -28.12, 2.11 | <b>0.089</b> |
| Palmitoleic (C16:1 <i>cis</i> 9)                      | -0.01       | -0.27, 0.24  | 0.907        |
| <i>trans</i> -palmitoleic (C16:1 <i>trans</i> )       | 5.25        | 0.22, 10.29  | <b>0.041</b> |
| Heptadecenoic (C17:1)                                 | 1.13        | -0.76, 3.02  | 0.231        |
| Oleic (C18:1 <i>cis</i> 9)                            | 0.16        | -0.03, 0.05  | 0.414        |
| <i>Cis</i> -vaccenic (C18:1 <i>cis</i> 11)            | -0.16       | -0.71, 0.38  | 0.546        |
| Rumenic (C18:2, <i>cis</i> 9, <i>trans</i> 11)        | 0.83        | -0.96, 2.63  | 0.348        |
| Linoleic (C18:2)                                      | -0.01       | -0.04, 0.03  | 0.625        |
| Dihomo-gamma-linolenic (C20:3)                        | -0.19       | -0.59, 0.20  | 0.328        |
| Arachidonic (C20:4)                                   | -0.03       | -0.12, 0.07  | 0.547        |
| Alpha linolenic ( $\alpha$ C18:3)                     | 1.22        | 0.10, 2.34   | <b>0.033</b> |
| Eicosapentaenoic (C20:5)                              | 0.17        | -0.40, 0.75  | 0.540        |
| Docosapentaenoic (C22:5)                              | 0.00        | -1.60, 1.60  | 0.999        |
| Docosahexaenoic (C22:6)                               | 0.06        | 0.29, 0.41   | 0.715        |
| Dimethyl acetal C16 (DMA C16:0)                       | 0.60        | -0.52, 1.72  | 0.282        |
| Dimethyl acetal C18 (DMA C18:0)                       | -0.58       | -1.49, 0.32  | 0.198        |

Analyses adjusted for sex, body mass index, and alcohol and dairy consumption. Coefficient indicates the adjusted difference in fatty acid concentration of HIV-infected participants compared to HIV-uninfected participants (reference category).

**Table S3. Adjusted differences in fatty acid groups and calculated ratios estimating desaturases and elongases activity, according to HIV status**

|                               | Coefficient | 95% CI       | p-value      |
|-------------------------------|-------------|--------------|--------------|
| <b>ΣSFA</b>                   | 0.00        | -0.09, 0.09  | 0.931        |
| <b>ΣMUFA</b>                  | 0.13        | -0.23, 0.05  | 0.458        |
| <b>ΣPUFA</b>                  | -0.01       | -0.04, 0.02  | 0.546        |
| <b>Σomega-3</b>               | 0.12        | -0.13, 0.37  | 0.338        |
| <b>Σomega-6</b>               | -0.01       | -0.04, 0.02  | 0.461        |
| <b>SFA/PUFA</b>               | 0.31        | -0.76, 1.39  | 0.557        |
| <b>SFA/MUFA</b>               | -0.10       | -0.89, 0.69  | 0.791        |
| <b>MUFA/PUFA</b>              | 0.35        | -0.40, 1.11  | 0.342        |
| <b>Omega-6/omega-3</b>        | -0.01       | -0.04, 0.01  | 0.307        |
| <b>Desaturases</b>            |             |              |              |
| Delta-5 omega-3 (C20:5/C18:4) | -0.04       | -0.15, 0.07  | 0.478        |
| Delta-5 omega-6 (C20:4/C20:3) | 0.00        | -0.09, 0.09  | 0.927        |
| Delta-6 omega-3 (C22:6/C22:5) | 0.01        | -0.02, 0.04  | 0.626        |
| Delta-9 (C14:1/C14:0)         | -8.04       | -17.39, 1.30 | <b>0.089</b> |
| <b>Elongases</b>              |             |              |              |
| C16:0/C14:0                   | -0.02       | -0.04, 0.00  | <b>0.052</b> |
| C18:0/C16:0                   | -1.32       | -4.89, 2.25  | 0.456        |
| C20:0/C18:0                   | 1.11        | -5.27, 7.49  | 0.724        |
| C22:0/C20:0                   | 0.35        | -0.10, 0.80  | 0.122        |
| C24:0/C22:0                   | -0.06       | -0.10, -0.01 | <b>0.018</b> |
| C20:3/C18:3                   | -2.35       | -12.40, 7.71 | 0.636        |
| C18:1/C16:1                   | 0.01        | -0.02, 0.03  | 0.641        |
| C22:5/C20:5                   | -0.22       | -0.57, 0.14  | 0.220        |

Analyses adjusted for sex, body mass index, and alcohol and dairy consumption. Coefficient indicates the adjusted difference in plasma concentrations among HIV-infected participants compared to HIV-uninfected participants (reference category)

**Figure S1. Observation plot representing the fatty acids on the dimensions extracted from the principal component analysis.**

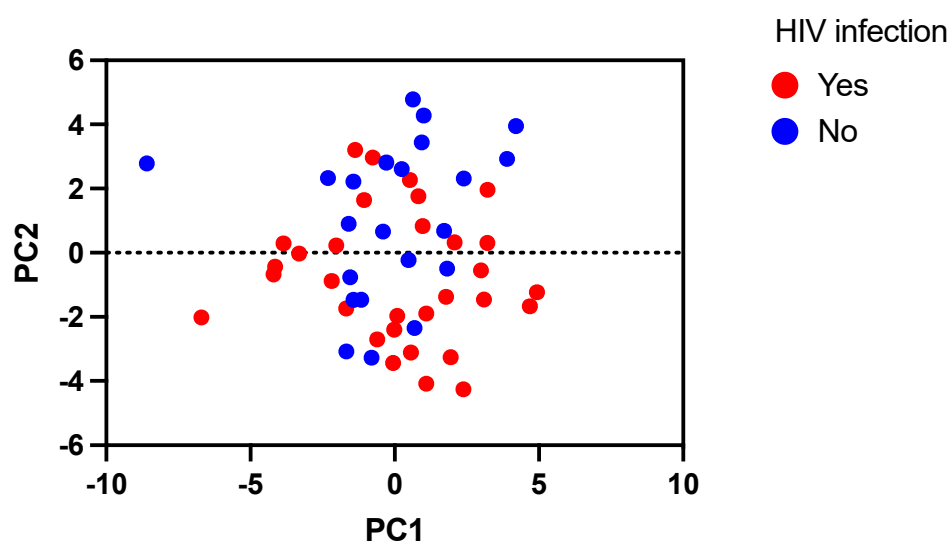

**Explained variance: PC1 = 15%; PC2 = 12%**

PC1 and PC2 represent the two dimensions that explain the greatest amount of variance.
